# Supplementary material for: Platinum nanoparticles on reduced graphene oxide as peroxidase mimetics for the colorimetric detection of specific DNA sequence
Source: Royal Society of Chemistry journal article supplement (doi:10.1039/c6tb00741d), 2016-01-01
Supplement: c6tb00741d1.pdf [file c6tb00741d1.pdf]

## **Electronic Supplementary Information (ESI)**

### **Platinum nanoparticles on reduced graphene oxide as peroxidase mimetics for colorimetric detection of specific DNA sequence**

Li Yin Chau,<sup>a</sup> Qijin He,<sup>a</sup> Ailin Qin,<sup>a</sup> Shea Ping Yip<sup>b</sup> and Thomas M. H. Lee<sup>\*a</sup>

<sup>a</sup> Interdisciplinary Division of Biomedical Engineering, The Hong Kong Polytechnic University, Hung Hom, Kowloon, Hong Kong, China. E-mail: ming-hung.lee@polyu.edu.hk; Fax: +852-23342429; Tel: +852-27664931

<sup>b</sup> Department of Health Technology and Informatics, The Hong Kong Polytechnic University, Hung Hom, Kowloon, Hong Kong, China

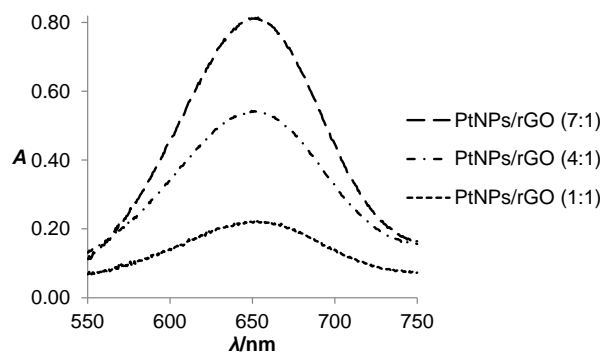

**Fig. S1** Visible absorption spectra of the oxidized TMB solution for PtNPs/rGO of different mass ratios (1:1, 4:1, and 7:1). The concentrations of TMB,  $\text{H}_2\text{O}_2$ , and PtNPs/rGO were 0.83 mM, 20 mM, and  $50 \text{ ng mL}^{-1}$ , respectively. The spectra were measured at 10 min after the mixing of all components.

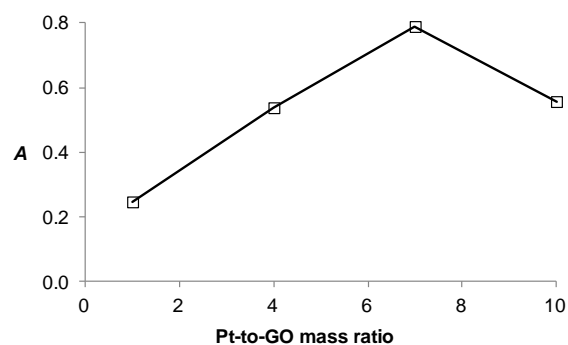

**Fig. S2** Comparison of the peroxidase-like activity of PtNPs/rGO of different mass ratios (1:1, 4:1, 7:1, and 10:1). The concentrations of TMB,  $\text{H}_2\text{O}_2$ , and PtNPs/rGO were 0.83 mM, 20 mM, and  $50 \text{ ng mL}^{-1}$ , respectively. The absorbance at 652 nm was taken at 10 min after the mixing of all components.

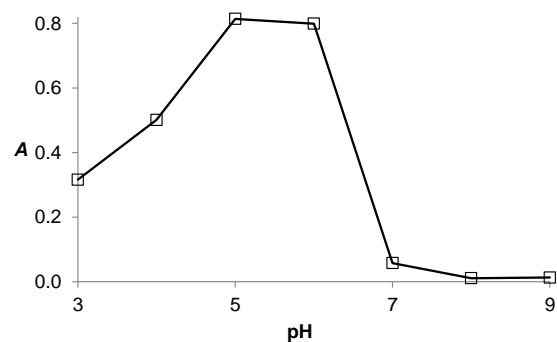

**Fig. S3** The effect of pH on the peroxidase-like activity of PtNPs/rGO (mass ratio of 7:1). The concentrations of TMB,  $\text{H}_2\text{O}_2$ , and PtNPs/rGO were 0.83 mM, 20 mM, and  $50 \text{ ng mL}^{-1}$ , respectively. The absorbance at 652 nm was taken at 10 min after the mixing of all components.

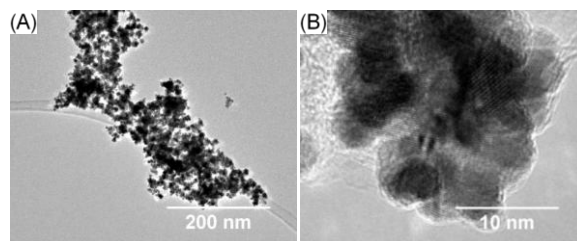

**Fig. S4** Transmission electron microscopy (TEM) photographs of PtNPs/rGO of 10:1 mass ratio at (A) low and (B) high magnification.

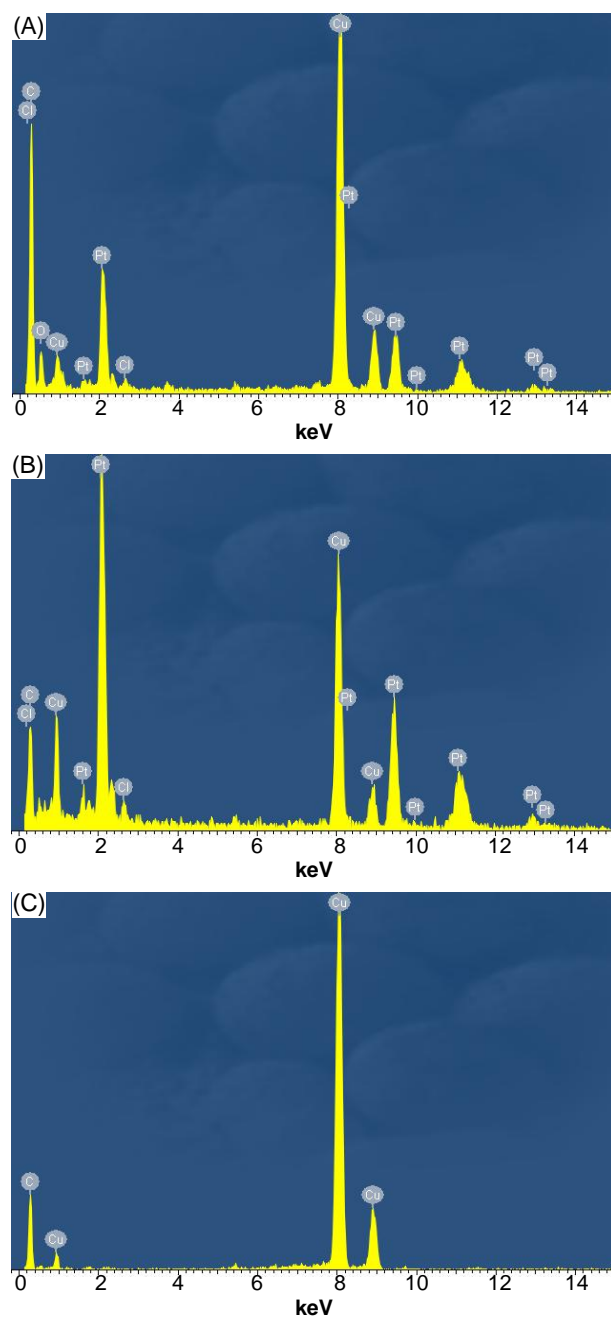

**Fig. S5** Energy-dispersive X-ray spectroscopy (EDS) patterns of (A) PtNPs/rGO of 7:1 mass ratio, (B) PtNPs, and (C) background signal from the supporting TEM grid.

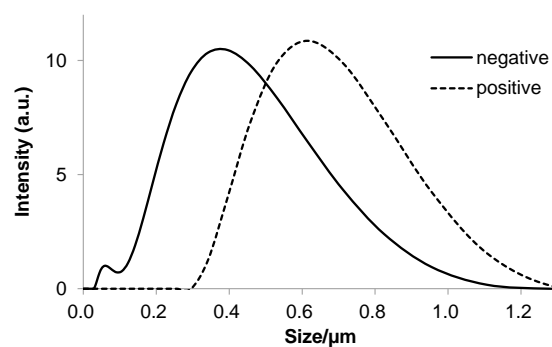

**Fig. S6** Dynamic light scattering (DLS) analysis of PtNPs/rGO (mass ratio of 7:1) after 1 h incubation with negative (without target) or positive (with target) PCR product in 50 mM NaCl. The concentration of the PtNPs/rGO was  $1 \mu\text{g mL}^{-1}$  and the PCR product was diluted by 80-fold.

**Table S1** Comparison of the kinetic parameters of the PtNPs/rGO developed in this work with horseradish peroxidase (HRP) and some other previously reported nanomaterial-based enzyme mimetics.  $[E_t]$  is the total concentration (free and bound states) of the enzyme mimetics or HRP,  $K_M$  is the Michaelis constant, and  $V_{max}$  is the maximal velocity.

|                                       | $[E_t]/\mu\text{g mL}^{-1}$ | TMB as substrate |                                    | $\text{H}_2\text{O}_2$ as substrate |                                    |
|---------------------------------------|-----------------------------|------------------|------------------------------------|-------------------------------------|------------------------------------|
|                                       |                             | $K_M/\text{mM}$  | $V_{max}/10^{-8} \text{ M s}^{-1}$ | $K_M/\text{mM}$                     | $V_{max}/10^{-8} \text{ M s}^{-1}$ |
| PtNPs/rGO <sup>a</sup>                | 0.05 <sup>b</sup>           | 0.0806           | 46.5                               | 935                                 | 378                                |
| HRP (Ref. 1)                          | 0.001                       | 0.434            | 10.0                               | 3.70                                | 8.71                               |
| $\text{Fe}_3\text{O}_4$ MNPs (Ref. 1) | 40                          | 0.098            | 3.44                               | 154                                 | 9.78                               |
| GO (Ref. 13)                          | 40                          | 0.0237           | 3.45                               | 3.99                                | 3.85                               |
| PtNPs (Ref. 15)                       | 0.03                        | 0.120            | 126                                | 769                                 | 185                                |
| PtNPs (Ref. 24)                       | 10                          | 3.417            | 400                                | -                                   | -                                  |
| PtNPs/rGO (Ref. 24)                   | 50                          | 0.619            | 127                                | -                                   | -                                  |
| MNPs–PtNPs/rGO (Ref. 24)              | 50                          | 0.519            | 213                                | -                                   | -                                  |
| PtNPs/GO (Ref. 25)                    | -                           | 0.186            | 10.2                               | 221                                 | 12.5                               |

<sup>a</sup> The mass ratio of PtNPs/rGO was 7:1. The apparent kinetic parameters with TMB as substrate were calculated from the data in Fig. 4B (TMB concentration from 10  $\mu\text{M}$  to 0.1 mM) and those with  $\text{H}_2\text{O}_2$  as substrate were calculated from the data in Fig 4C.

<sup>b</sup> This concentration did not account for the mass of the PtNPs. If included, the concentration was 0.22  $\mu\text{g mL}^{-1}$ .
